# Supplementary material
Source: Springer Nature journal article supplement (https://www.springermedizin.de/resource/supplementary/12880_2010_249_MOESM2_ESM.pdf/9450006)

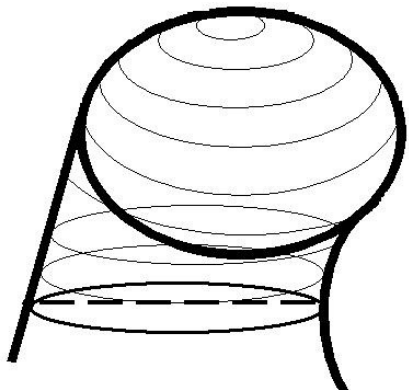

A

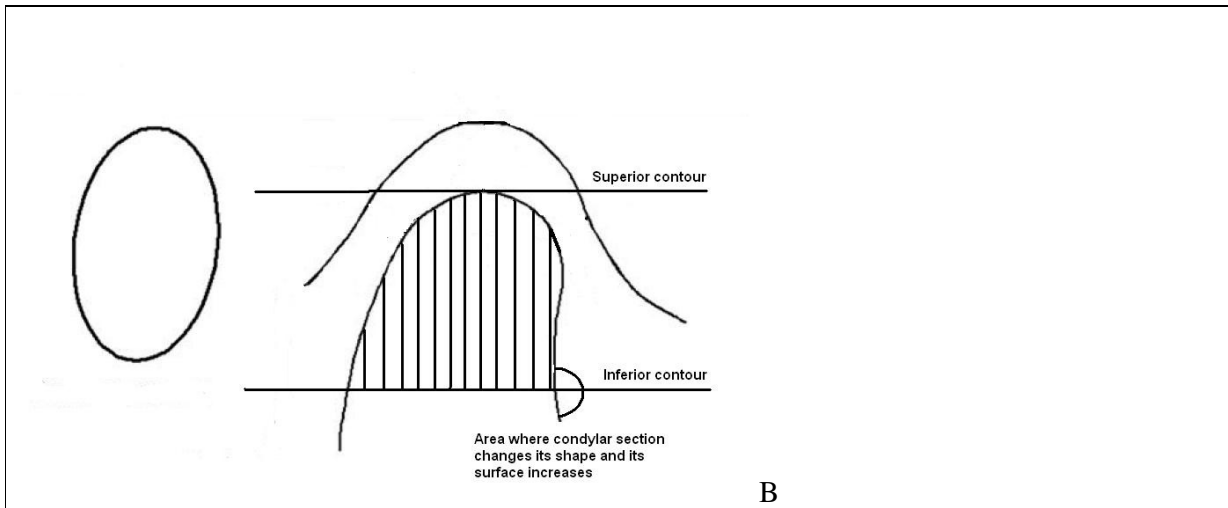

B

Supplement: MOESM2 [file 9450006]
